# Supplementary material
Source: PubMed Central journal article supplement (PMC10334294)
Supplement: jamaneurol-e232094-s003.pdf [file jamaneurol-e232094-s003.pdf]

## Supplemental Online Content

Bala F, Singh N, Buck B, et al. Safety and efficacy of tenecteplase compared with alteplase in patients with large vessel occlusion stroke: a prespecified secondary analysis of the ACT randomized clinical trial. *JAMA Neurol*. Published online July 10, 2023.  
doi:10.1001/jamaneurol.2023.2094

### eMethods

**eTable 1.** Baseline characteristics in patient who underwent versus did not undergo endovascular therapy

**eTable 2.** Primary and secondary outcomes stratified by occlusion location and treatment type

**eTable 3.** Baseline characteristics of patients with large vessel occlusion who did not undergo endovascular therapy (n=112)

**eTable 4.** Univariable and multivariable analyses of association of drug type with primary and secondary outcomes in patients who did not undergo EVT

**eFigure 1.** CONSORT Flow diagram. CTA= computed tomography angiography. LVO=large vessel occlusion

**eFigure 2.** Distribution of modified Rankin Scale score stratified by occlusion location

This supplemental material has been provided by the authors to give readers additional information about their work.

**eMethods:**

Reperfusion grade was assessed on the first and final angiographic imaging series of the thrombectomy procedure using the expanded Thrombolysis in Cerebral Infarction (eTICI) and was scored as follows: 0, no reperfusion of the downstream territory; 1, antegrade reperfusion past the initial occlusion, but limited distal branch filling; 2a, reperfusion in less than half of the previously occluded target artery ischemic territory; 2b, reperfusion of more than half of the previously occluded target artery ischemic territory; 2c, near complete reperfusion except for slow flow/occlusion in a few distal cortical vessels; and 3, complete reperfusion of the previously occluded target artery ischemic territory.

Recanalization of intracranial occlusions was assessed using the revised arterial occlusion (rAOL) scale on the first angiographic imaging series of the thrombectomy procedure: 0, primary occlusive thrombus remains the same; 1, debulking of proximal part of the thrombus but without any recanalization; 2a, partial or complete recanalization of the primary thrombus with occlusion in major distal vascular branches; 2b, partial or complete recanalization of the primary thrombus with occlusion in minor distal vascular branches, or partial recanalization of the primary thrombus with no thrombus in the vascular tree at or beyond the primary occlusive thrombus; and 3, complete recanalization of the primary occlusive thrombus with no clot in the vascular tree beyond.

Standard of care imaging at 24 h after thrombolysis administration was assessed for any intracranial haemorrhage, and classified using the Heidelberg classification, which describes 4 types of haemorrhage within the infarcted tissue (haemorrhagic infarction type 1: scattered small petechiae; haemorrhagic infarction type 2: confluent petechiae; parenchymal hematoma type 1: hematoma occupying <30% of infarct with no substantive mass effect; and parenchymal hematoma type 2: hematoma occupying  $\geq$ 30% of infarct with obvious mass effect ), 2 types of hematoma outside the infarcted tissue (remote parenchymal hematoma type 1 and 2) along with subdural hematoma, subarachnoid haemorrhage and intraventricular hemorrhage.

**eTable 1. Baseline characteristics in patient who underwent versus did not undergo endovascular therapy.**

|                                                    | Non-EVT (n=112) | EVT (n=408)    | P value |
|----------------------------------------------------|-----------------|----------------|---------|
| Baseline characteristics                           |                 |                |         |
| Age, median (IQR)                                  | 77.5 (66-90)    | 73 (63-81)     | <0.001  |
| Female sex                                         | 67 (59.8)       | 216 (52.9)     | 0.20    |
| Baseline NIHSS, median (IQR)                       | 14 (6- 20)      | 18 (12- 22)    | <0.001  |
| Workflow times, min                                |                 |                |         |
| Time from onset to hospital arrival                | 83 (52- 152)    | 72 (50- 115.5) | 0.10    |
| Time from onset to randomization                   | 127 (87- 181)   | 101 (77- 144)  | 0.001   |
| Time from onset to needle                          | 134 (95- 189)   | 105 (83- 150)  | <0.001  |
| Time from hospital arrival to needle               | 37 (29- 50)     | 32 (25- 40)    | <0.001  |
| Type of enrolling centre                           |                 |                | 0.26    |
| Primary stroke centre                              | 9 (8.0)         | 21 (5.2)       |         |
| Comprehensive stroke centre                        | 103 (92.0)      | 387 (94.8)     |         |
| Imaging characteristics                            |                 |                |         |
| Occlusion location                                 |                 |                | 0.001   |
| ICA                                                | 19 (17.0)       | 116 (28.4)     |         |
| M1-MCA                                             | 46 (41.1)       | 191 (46.8)     |         |
| M2-MCA                                             | 34 (30.4)       | 83 (20.3)      |         |
| Basilar artery                                     | 13 (11.6)       | 18 (4.4)       |         |
| Carotid tandem lesion                              | 20 (18.3)       | 79 (19.6)      | 0.89    |
| Collateral grade (anterior circulation occlusions) | n=97            | n=389          | 0.04    |
| Poor                                               | 19 (19.6)       | 44 (11.3)      |         |
| Intermediate                                       | 44 (45.4)       | 220 (56.5)     |         |
| Good                                               | 34 (35.0)       | 125 (32.1)     |         |
| ASPECTS, median (IQR)                              | 9 (8-10)        | 8 (7-9)        | 0.01    |
| Clot burden score, median (IQR)                    | 7.5 (6-9)       | 6 (4-8)        | <0.001  |

|                              |           |            |      |
|------------------------------|-----------|------------|------|
| Clinical and safety outcomes |           |            |      |
| mRS 0-1 at 90d               | 29 (25.9) | 133 (32.6) | 0.20 |
| mRS 0-2 at 90d               | 48 (42.9) | 212 (51.9) | 0.11 |
| Death at 90d                 | 30 (26.8) | 69 (16.9)  | 0.02 |
| sICH                         | 5 (4.5)   | 22 (5.4)   | 0.81 |

Data are n (%) or median (IQR). ASPECTS= Alberta Stroke Program Early CT Score.  
EVT=endovascular thrombectomy. ICA= intracranial internal carotid artery. MCA=middle cerebral artery. NIHSS=National Institute of Health Stroke Scale. mRS=modified Rankin Scale score.  
sICH=symptomatic intracranial haemorrhage.

**eTable 2. Primary and secondary outcomes stratified by occlusion location and treatment type.**

|                                         | IV Tenecteplase | IV Alteplase | P value |
|-----------------------------------------|-----------------|--------------|---------|
| ICA occlusion (n=135)                   | n=69            | n=66         |         |
| mRS 0-1 at 90d                          | 18 (26.1)       | 12 (18.2)    | 0.30    |
| mRS 0-2 at 90d                          | 26 (37.7)       | 26 (39.4)    | 0.86    |
| Death at 90d                            | 20 (29.0)       | 17 (25.7)    | 0.70    |
| Initial run rAOL 2b-3 (n=114)           | 1 (1.7)         | 5 (9.1)      | 0.10    |
| Initial run eTICI score 2b-3<br>(n=114) | 3 (5.1)         | 6 (10.9)     | 0.31    |
| Final eTICI score 2b-3 (n=114)          | 50 (84.7)       | 49 (89.1)    | 0.58    |
| sICH                                    | 5 (7.2)         | 2 (3.0)      | 0.44    |
| PH2                                     | 5 (7.3)         | 3 (4.8)      | --      |
| M1-MCA occlusion (n=237)                | n=118           | n=119        |         |
| mRS 0-1 at 90d                          | 41 (34.7)       | 36 (30.2)    | 0.49    |
| mRS 0-2 at 90d                          | 64 (54.2)       | 60 (50.4)    | 0.60    |
| Death at 90d                            | 17 (14.4)       | 21 (17.6)    | 0.59    |
| Initial run rAOL 2b-3 (n=190)           | 24 (25.5)       | 14 (14.6)    | 0.07    |
| Initial run eTICI score 2b-3<br>(n=190) | 13 (13.8)       | 10 (10.4)    | 0.51    |
| Final eTICI score 2b-3 (n=190)          | 80 (85.1)       | 87 (90.6)    | 0.27    |
| sICH                                    | 3 (2.5)         | 5 (4.2)      | 0.72    |
| PH2                                     | 3 (2.5)         | 3 (2.6)      | --      |
| M2-MCA occlusion (n=117)                | n=65            | n=52         |         |
| mRS 0-1 at 90d                          | 22 (33.8)       | 19 (36.5)    | 0.85    |
| mRS 0-2 at 90d                          | 32 (49.2)       | 31 (59.6)    | 0.35    |
| Death at 90d                            | 13 (20.0)       | 6 (11.5)     | 0.31    |
| Initial run rAOL 2b-3 (n=83)            | 9 (20.0)        | 8 (21.0)     | 0.99    |
| Initial run eTICI score 2b-3<br>(n=83)  | 2 (4.4)         | 4 (10.5)     | 0.40    |

|                                        |           |           |      |
|----------------------------------------|-----------|-----------|------|
| Final eTICI score 2b-3 (n=83)          | 37 (82.2) | 32 (84.2) | 0.99 |
| sICH                                   | 7 (10.8)  | 3 (5.8)   | 0.51 |
| PH2                                    | 4 (6.2)   | 4 (7.7)   | 0.99 |
| Basilar occlusion (n=31)               | n=11      | n=20      |      |
| mRS 0-1 at 90d                         | 5 (45.4)  | 9 (45.0)  | --   |
| mRS 0-2 at 90d                         | 7 (63.6)  | 14 (70.0) | 0.99 |
| Death at 90d                           | 2 (18.2)  | 3 (15.0)  | --   |
| Initial run rAOL 2b-3 (n=18)           | 2 (25.0)  | 2 (20.0)  | --   |
| Initial run eTICI score 2b-3<br>(n=18) | 1 (12.5)  | 1 (10.0)  | --   |
| Final eTICI score 2b-3 (n=18)          | 7 (87.5)  | 9 (90.0)  | --   |
| sICH                                   | 1 (9.1)   | 1 (5.0)   | --   |
| PH2                                    | 1 (9.1)   | 1 (5.0)   | --   |

P value was not reported if number of events was smaller than 15.

Data are n/N (%). eTICI=extended Thrombolysis in Cerebral Infarction. mRS=modified Rankin Scale. rAOL=revised Arterial Occlusive Lesion score. sICH=symptomatic intracranial hemorrhage. PH2=parenchymal hematoma type 2.

**eTable 3. Baseline characteristics of patients with large vessel occlusion who did not underwent endovascular therapy (n=112)**

|                                                          | IV Tenecteplase (n=56) | IV Alteplase (n=56) | P value |
|----------------------------------------------------------|------------------------|---------------------|---------|
| Baseline characteristics                                 |                        |                     |         |
| Age, median (IQR)                                        | 80 (66.5-90.5)         | 75.5 (63.5-87.5)    | 0.25    |
| Female sex                                               | 34 (60.7)              | 33 (58.9)           | 0.99    |
| Baseline NIHSS, median (IQR)                             | 14 (6- 20)             | 14 (4- 20)          | 0.72    |
| Workflow times, min                                      |                        |                     |         |
| Time from onset to hospital arrival (n=111)              | 88 (56- 143)           | 82 (48- 156)        | 0.56    |
| Time from onset to needle (n=111)                        | 131 (101- 183)         | 137 (88- 190)       | 0.74    |
| Type of enrolling centre                                 |                        |                     | 0.99    |
| Primary stroke centre                                    | 4 (7.1)                | 5 (8.9)             |         |
| Comprehensive stroke centre                              | 52 (92.9)              | 51 (91.7)           |         |
| Imaging characteristics                                  |                        |                     |         |
| Occlusion location                                       |                        |                     | 0.18    |
| ICA                                                      | 10 (17.9)              | 9 (16.1)            |         |
| M1-MCA                                                   | 23 (41.1)              | 23 (41.1)           |         |
| M2-MCA                                                   | 20 (35.7)              | 14 (25.0)           |         |
| Basilar artery                                           | 3 (5.4)                | 10 (17.8)           |         |
| Carotid tandem lesion (n=109)                            | 16 (30.2)              | 8 (14.3)            | 0.06    |
| Collateral grade (anterior circulation occlusions, n=97) | n=232                  | n=248               | 0.40    |
| Poor                                                     | 9 (17.3)               | 10 (22.2)           |         |
| Intermediate                                             | 27 (51.9)              | 17 (37.8)           |         |
| Good                                                     | 16 (30.8)              | 18 (40.0)           |         |
| ASPECTS, median (IQR)                                    | 9 (8-10)               | 9 (8-10)            | 0.39    |

Data are n (%) or median (IQR). ASPECTS= Alberta Stroke Program Early CT Score. EVT=endovascular thrombectomy. ICA= intracranial internal carotid artery. MCA=middle cerebral artery. NIHSS=National Institute of Health Stroke Scale. mRS=modified Rankin Scale score. sICH=symptomatic intracranial haemorrhage.

**eTable 4. Univariable and multivariable analyses of association of drug type with primary and secondary outcomes in patients who did not undergo EVT.**

|                                             | IV Tenecteplase (n=56) | IV Alteplase (n=56) | Unadjusted RR (95% CI) | Adjusted RR (95% CI)* |
|---------------------------------------------|------------------------|---------------------|------------------------|-----------------------|
| mRS 0-1 at 90d                              | 17 (30.4)              | 12 (21.4)           | 1.42 (0.74-2.69)       | 2.01 (1.21-3.30)      |
| mRS 0-2 at 90d                              | 25 (44.6)              | 23 (41.1)           | 1.09 (0.84-1.41)       | 1.21 (0.87-1.68)      |
| Death at 90d                                | 14 (25.0)              | 16 (28.6)           | 0.87 (0.51-1.50)       | 0.74 (0.47-1.17)      |
| sICH                                        | 3 (5.4)                | 2 (3.6)             | 1.11 (0.48-2.53)       | --                    |
| Imaging identified intracranial haemorrhage | 10 (17.9)              | 9 (16.1)            | 1.33 (0.31-5.72)       | --                    |
| Any PH                                      | 4 (7.1)                | 3 (5.4)             | 1.50 (0.26-8.70)       | --                    |

\*Effect estimates were derived from Mixed-effects Poisson regression with adjustments for age, occlusion location, carotid tandem occlusion, and site as a random-effects variable.

mRS=modified Rankin Scale. sICH=symptomatic intracranial hemorrhage. PH=parenchymal hematoma



**eFigure. CONSORT Flow diagram.** CTA= computed tomography angiography. LVO=large vessel occlusion

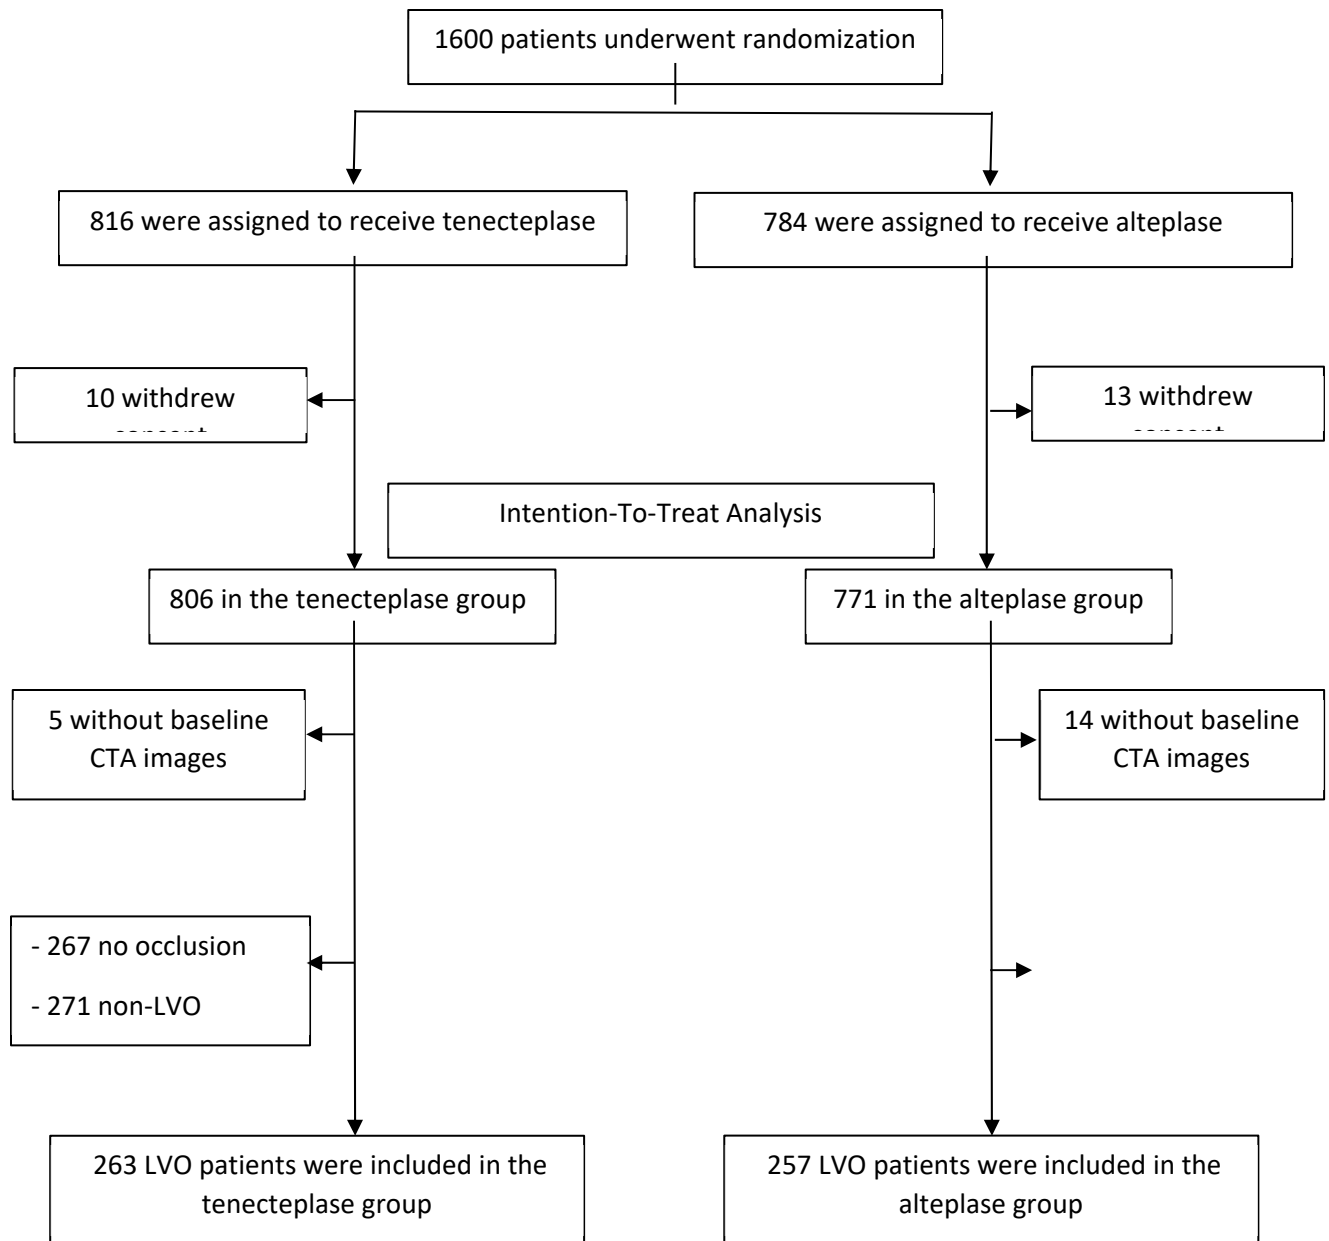

### Modified Rankin Scale Score by Occlusion Location

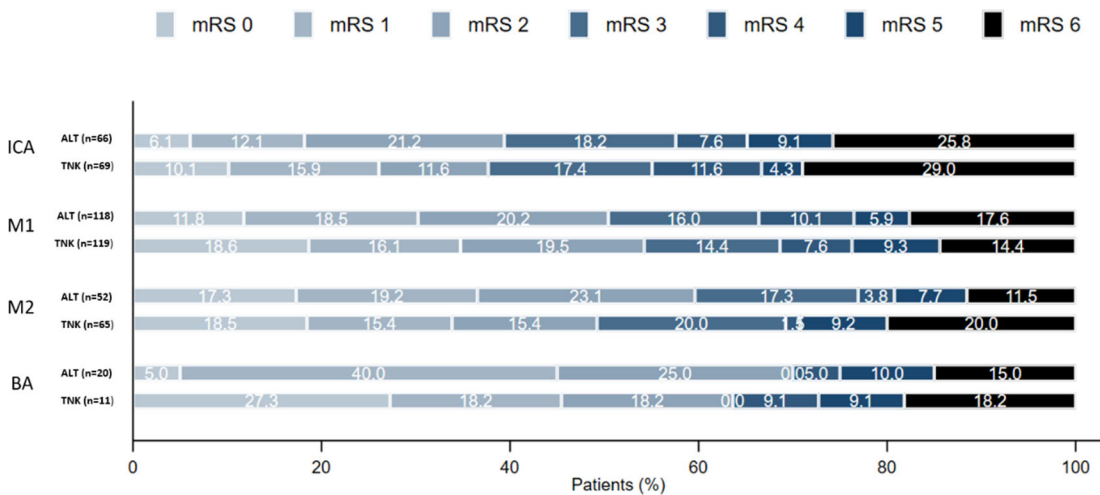

**eFigure 2. Distribution of modifies Rankin Scale score stratified by occlusion location.**
