# Supplementary material
Source: PubMed Central journal article supplement (PMC10334294)
Supplement: jamaneurol-e232094-s004.pdf [file jamaneurol-e232094-s004.pdf]

## Data Sharing Statement

Bala. Safety and Efficacy of Tenecteplase Compared With Alteplase in Patients With Stroke With Large Vessel Occlusion Stroke. *JAMA Neurol.* Published July 10, 2023.

doi:10.1001/jamaneurol.2023.2094

### Data

**Data available:** Yes

**Data types:** Other (please specify)

**Additional Information:** Data from this study are currently not publicly available. We will share anonymized data upon reasonable request from any qualified investigator after clearance by the local ethics committee. A request for access to the data can be made by sending an email together with a research plan to [mohammed.almekhlafi1@ucalgary.ca](mailto:mohammed.almekhlafi1@ucalgary.ca)

**How to access data:** Data from this study are currently not publicly available. We will share anonymized data upon reasonable request from any qualified investigator after clearance by the local ethics committee. A request for access to the data can be made by sending an email together with a research plan to [mohammed.almekhlafi1@ucalgary.ca](mailto:mohammed.almekhlafi1@ucalgary.ca)

**When available:** With publication

### Supporting Documents

**Document types:** None

### Additional Information

**Who can access the data:** qualified investigator after clearance by the local ethics committee

**Types of analyses:** any purpose

**Mechanisms of data availability:** without investigator support and after approval of a proposal and a signed data access agreement

**Any additional restrictions:** Canada law, law of participating centers and regulations of respective ethics committees.
